# Supplementary material for: Development of a conditionally immortalized human pancreatic β cell line
Source: JCI journal article supplement (doi:10.1172/jci72674), 2014-03-24
Supplement: sd1 [file 1]

## SUPPLEMENTAL INFORMATION

### **Supplemental Figure S1: Development of insulinomas and conditionally immortalized human pancreatic beta cell line.**

(A) Schematic representation of the multi-steps procedure developed to derive the EndoC-βH2 cells. Human fetal pancreas was co-transduced with SV40 LT and hTERT excisable lentiviral vectors and grafted under the kidney capsule of immune-incompetent SCID mice. EndoC-βH2 cells were derived following 4 rounds of successive transplantation (first-fourth insulinoma; k: kidney; i: insulinoma) (B) Immunohistochemical analysis of part of the fourth insulinoma in comparison to sections of human adult pancreas. Insulinoma cells stained positive for Insulin (INS), SV40 LT, Ki67, PDX1, Chromogranin-A (CHGA). They stained negative for glucagon (GCG) and carboxypeptidase-A (CPA). Rare cells stained positive for somatostatin (SST). Nuclei were stained with Hoechst 33342 fluorescent stain (blue). Scale bar: 50 μm. (C) Bright field photograph of EndoC-βH2 cells in culture. Scale bar: 300 μm. (D) PCR analysis on genomic DNA from EndoC-βH2 cells indicates that cells have integrated both RIP405-SV40 LT and RIP405-hTERT. Genomic DNA from HEK 293T cells was used as negative control.

### **Supplemental Figure S2: Determination of the optimal dose of lentiviral vector for efficient CRE expression.**

(A) EndoC-βH2 cells were transduced with increasing amounts of lentiviral vector expressing CRE recombinase under the control of the CMV ubiquitous promoter. Lentiviral vector amount is expressed as ng of p24 capsid protein. Seven days after transduction, CRE immunostaining was performed to evaluate the percentage of CRE-expressing cells relative to total cell number for each condition of transduction (replicated four times with different lentiviral vector

batches). **(B)** EndoC-βH2 cells were transduced with increasing amounts of either CRE-expressing lentiviral vector (from 15 to 60 ng of p24 capsid protein) or with GFP expressing vector (60 ng of p24 capsid protein). The numbers of living cells were determined every 7 days.

**Supplemental Figure S3: Expression of CDK4 and CDK1 in EndoC-βH2 cells compared to human islets.**

**(A)** Real-time PCR quantification of *cdk4* and *cdk1* mRNA was performed on non-excised and excised EndoC-βH2 cells and human islets. Data are shown as the mean ± SEM of at least three independent experiments. \*\*\*P < 0.005 when compared to un-excised cells. **(B)** Immunoblot for CDK4, CDK1 and beta-actin. On the left, comparisons were performed between non-excised and excised EndoC-βH2 cells. The hepatoma cell line HepG2, used as a positive control. On the right, comparisons were performed between two human islet cell preparations and non-excised EndoC-βH2 cells.

**Supplemental Figure S4: Expression of Cyclins in EndoC-βH2 cells compared to human islets.**

**(A)** Real-time PCR quantification of *ccnd1*, *ccnd3*, *ccne2* and *ccnb2* mRNA was performed on non-excised and excised EndoC-βH2 cells and human islets. Data are shown as the mean ± SEM of at least three independent experiments. \*P < 0.05, \*\*P < 0.01, \*\*\*P < 0.005 when compared to un-excised cells. **(B)** Immunoblot for CCND1, CCND3, CCNE2, CCNB2 and beta-actin. On the left, comparisons were performed between non-excised and excised EndoC-βH2 cells. The hepatoma cell line HepG2, used as a positive control. On the right, comparisons were performed between two human islet cell preparations and non-excised EndoC-βH2 cells.

**Supplemental Figure S5: Global Comparative Genomic Hybridization (CGH array) profiles of EndoC- $\beta$ H2 cells at two different passages**

CGH arrays were performed on EndoC- $\beta$ H2 cells at passages 34 and 85. Male human genomic DNA was used as a reference. Genomic DNA was probed on Agilent SurePrint G3 Human CGH Bundle (4x180K) arrays.

Supplemental Figure S1

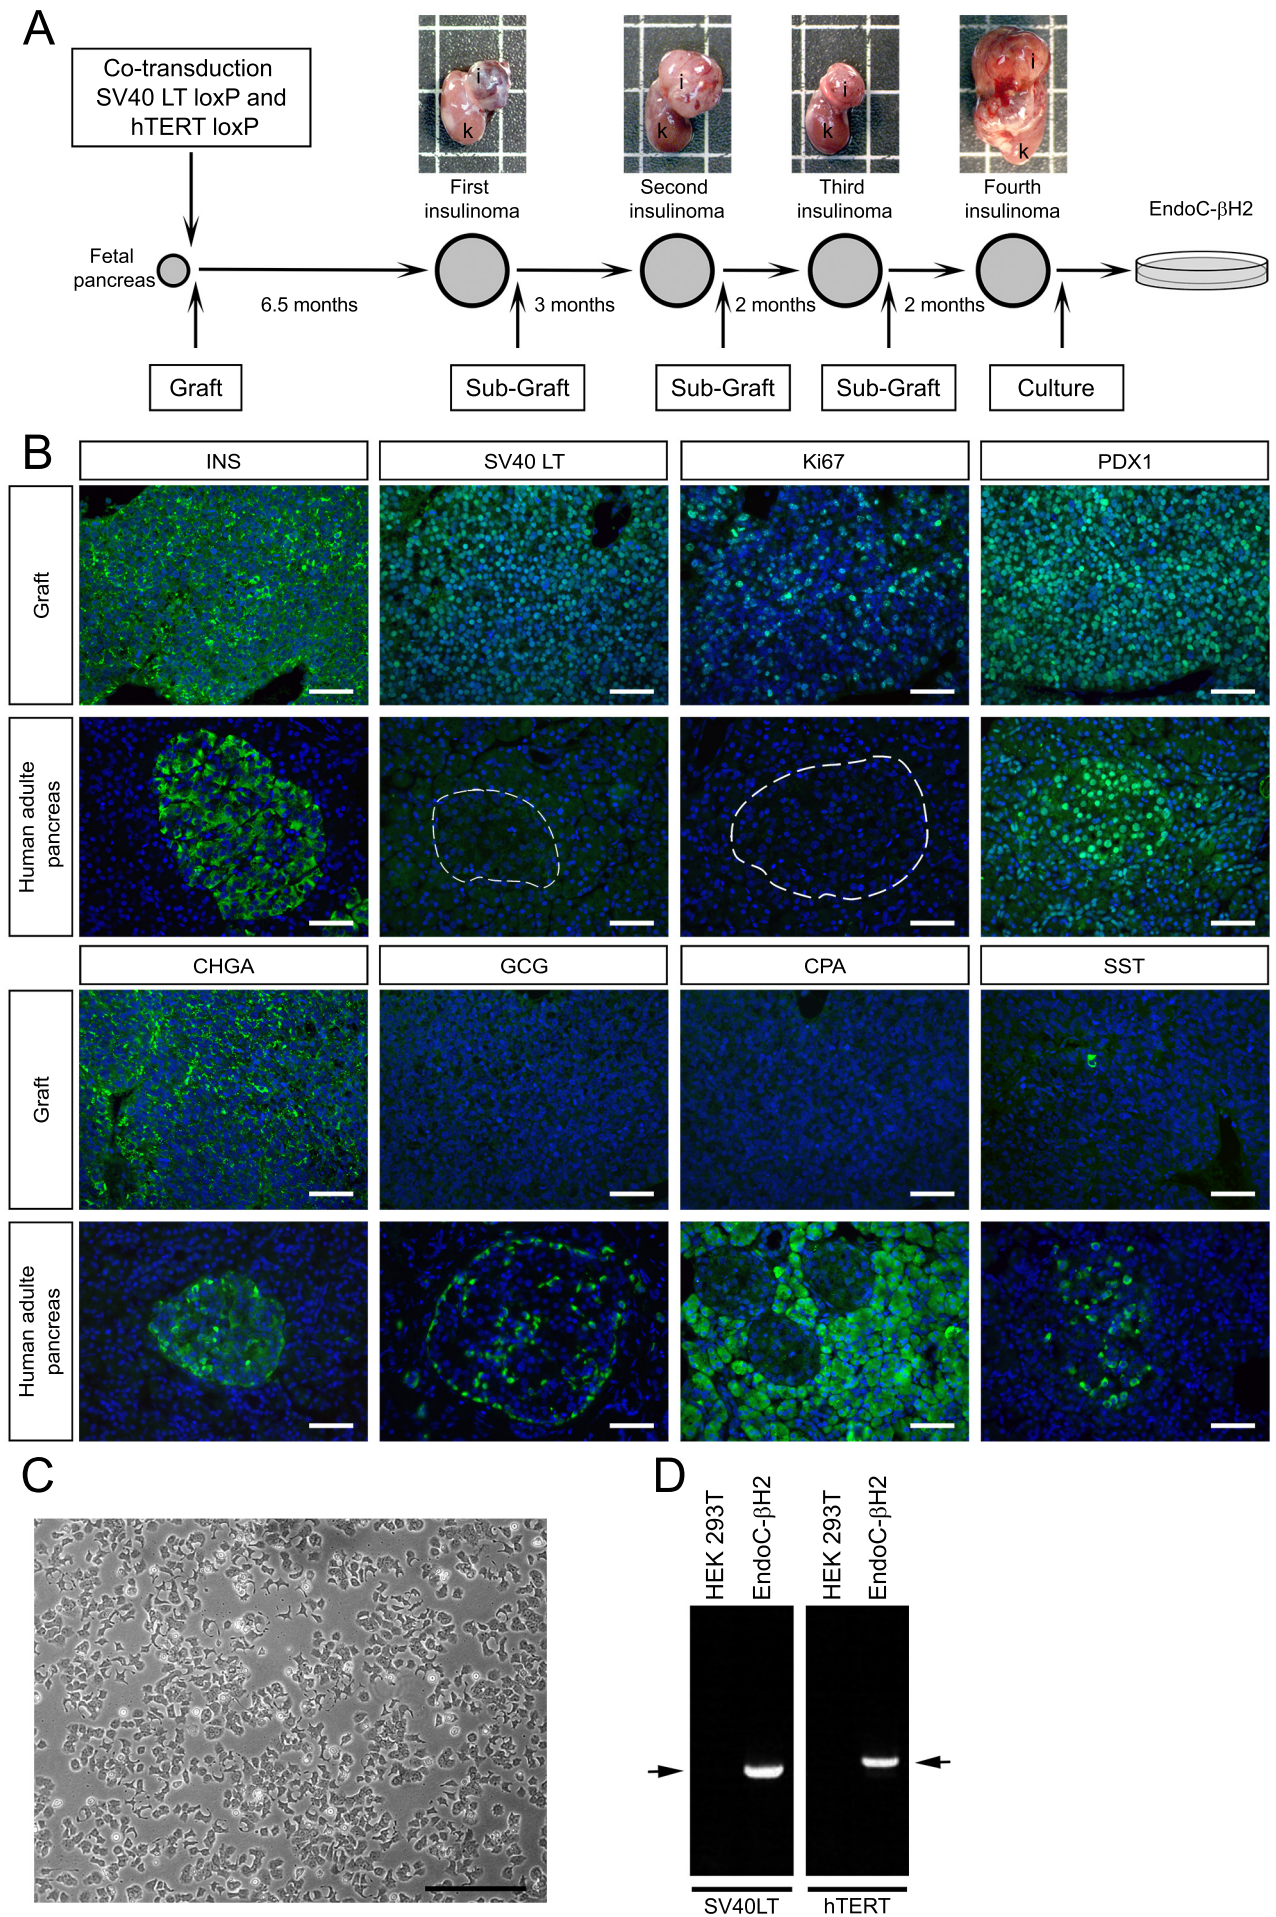

## Supplemental Figure S2

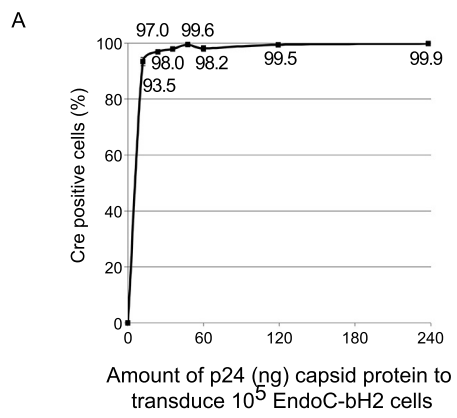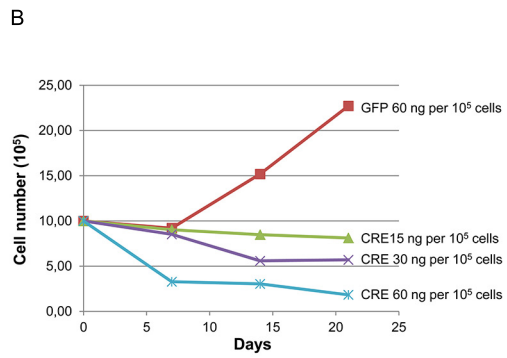

# Supplemental Figure S3

## A

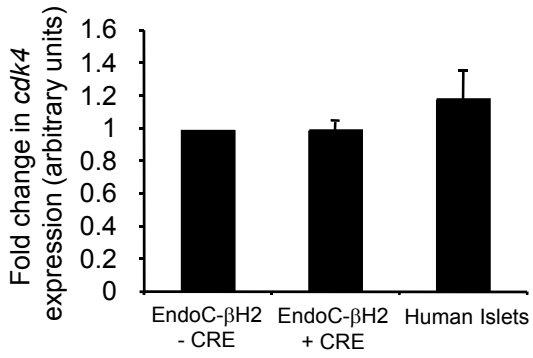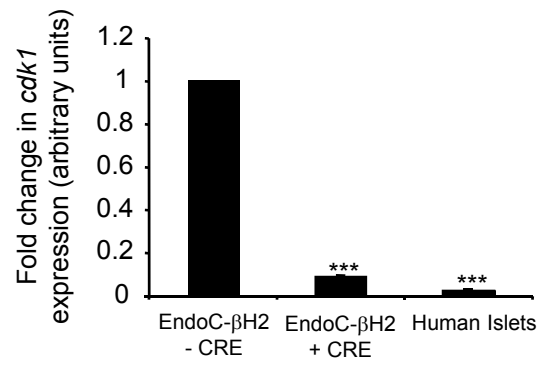

## B

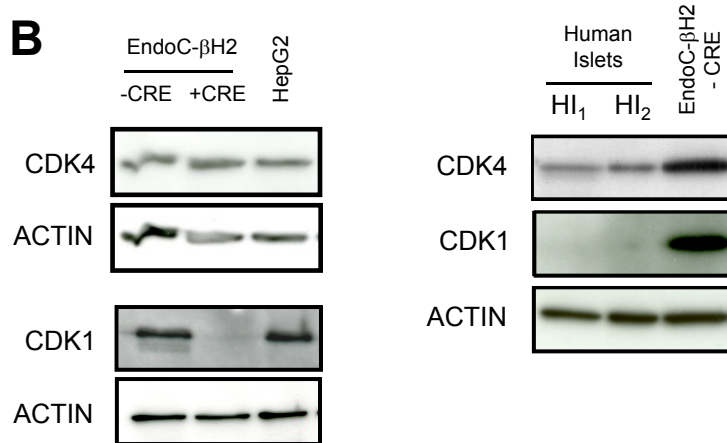

# Supplemental Figure S4

**A**

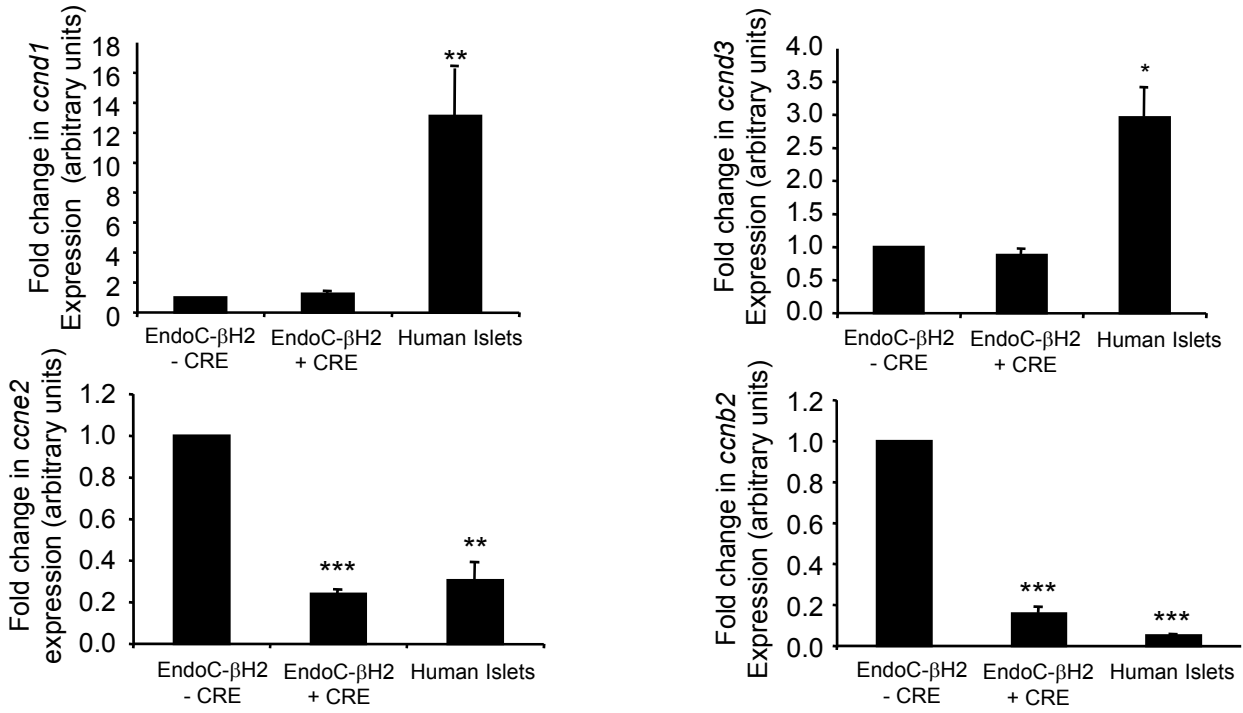

**B**

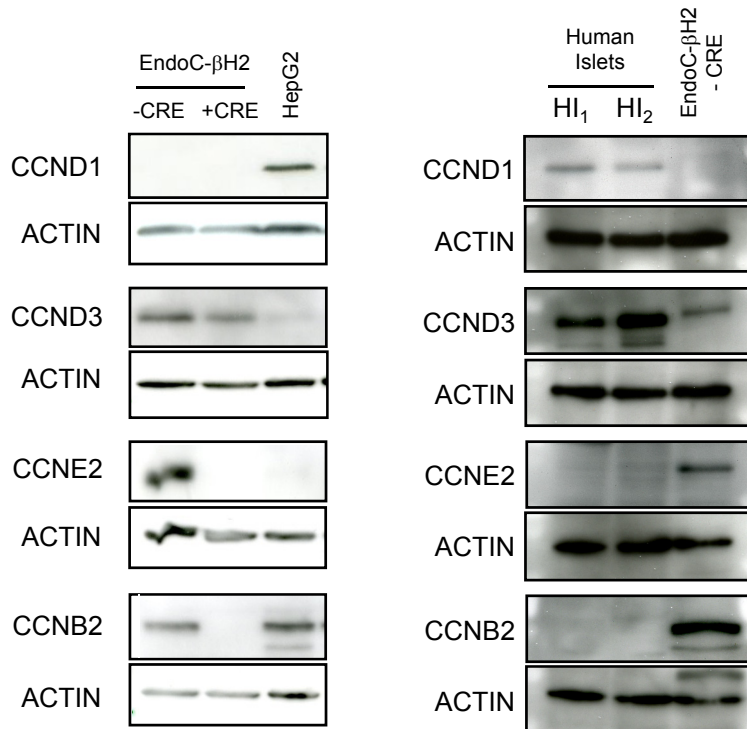

Supplemental Figure S5

EndoC- $\beta$ H2 passage 34

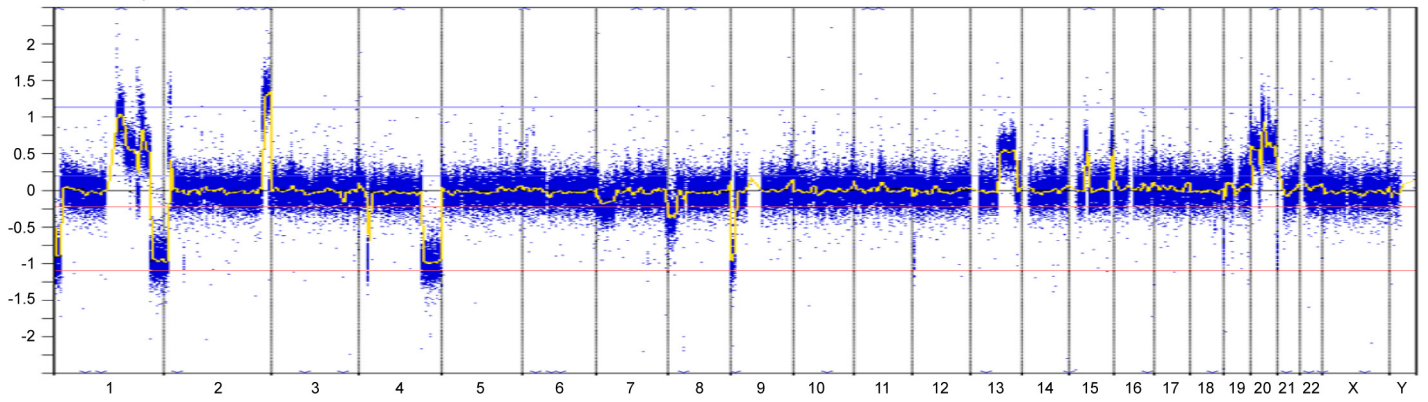

EndoC- $\beta$ H2 passage 85

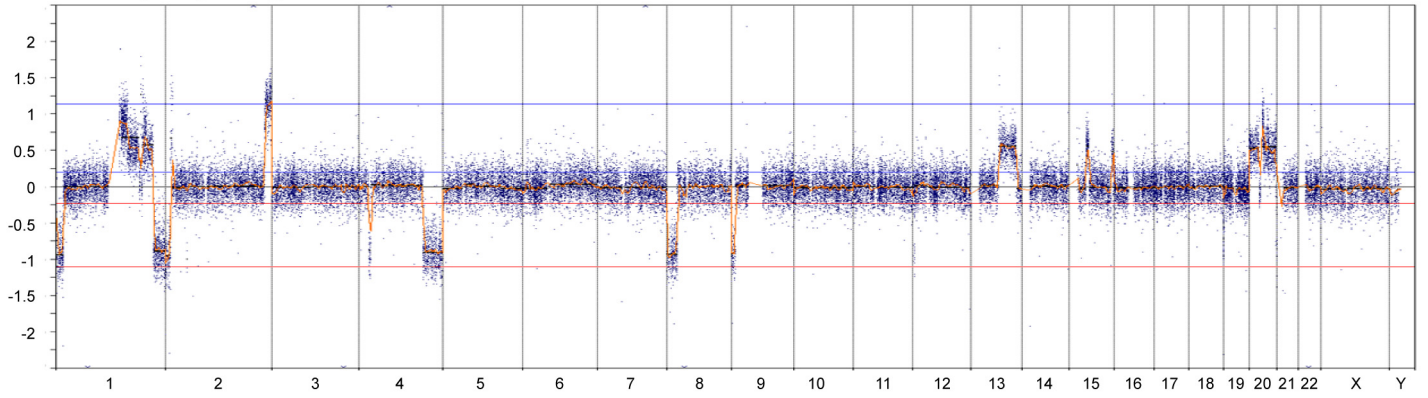



Supplemental table 1

|                                                | <b>EndoC-βH2 control</b> |      |       |       | <b>EndoC-βH2 + CRE</b> |      |      |      |
|------------------------------------------------|--------------------------|------|-------|-------|------------------------|------|------|------|
| Passage number                                 | 46                       | 59   | 62    | 77    | 46                     | 59   | 62   | 77   |
| Insulin content (µg per 10 <sup>6</sup> cells) | 0.066                    | 0.09 | 0.062 | 0.064 | 2.1                    | 2.75 | 1.98 | 2.5  |
| Glucose responsiveness in absence of IBMX      | NO                       | NO   | NO    | NO    | YES                    | YES  | YES  | YES  |
| Fold induction (0.5 mM vs 15mM glucose)        |                          |      |       |       | 3.13                   | 2.74 | 3.8  | 2.35 |

**SUPPLEMENTAL TABLE S2: Q-PCR probes and primers**

**Taqman probes**

| <b>Applied Biosystem Probe reference</b> | <b>Gene</b> |
|------------------------------------------|-------------|
| Hs00165861_m1                            | ABCC8       |
| Hs00265026_s1                            | KCNJ11      |
| Hs01096908_m1                            | SLC2A2      |
| Hs00374262_m1                            | RAB3A       |
| Hs00169095_m1                            | IAPP        |
| Hs99999904_m1                            | PPIA        |

**SybGreen primers**

| <b>Gene</b>     | <b>Forward primer (5' to 3')</b> | <b>Reverse primer (5' to 3')</b> |
|-----------------|----------------------------------|----------------------------------|
| Insulin         | AGAGGCCATCAAGCAGATCACTGT         | ACAGGTGTTGGTTCACAAAGGCTG         |
| SV40 LT         | TGCCTGGAACGCAGTGAGTTTT           | AACTCAGCCACAGGTCTGTACCAA         |
| hTERT transgene | TCAGTAACCCCCAGCCCTAA             | GCACCTCGCGGTAGTGG                |
| Ki-67           | AAGGAACAGCCTCAACCATCAGGA         | CCAAGCTTTGTGCCTTCACTCCA          |
| Cdk4            | TCAAGGTAACCCTGGTGTGTTGAGC        | GGCGCATCAGATCCTTGATCGTTT         |
| Cdk1            | CAGAGCTTTGGGCACTCCCAATAA         | GCTAGGCTTCCTGGTTCCATTG           |
| Ccnd1           | AACACGGCTCACGTTACCTCA            | ACGACAGACAAAGCGTCCCTCAA          |
| Ccnb2           | TCAGCATGATCCCTCAGCTGAAC          | ACGGCAGCCTAGGACCTTCCTAT          |
| Ccnd3           | TGGCTTACTGGATGCTGGAGGTAT         | ACAGGTAGCGATCCAGGTAGTTCA         |
| Ccne2           | GCTGCCTTGTGCCATTTTACCTC          | TCCCACTCCAAACCTGAGGCTTTC         |
| PPIA (cyclo)    | ATGGCAAATGCTGGACCAACA            | ACATGCTTGCCATCCAACCACT           |
| PDX1            | TACTGGATTGGCGTTGTTTGTGGC         | AGGGAGCCTTCCAATGTGTATGGT         |
| MAFA            | GAGTTGGCACTTCTCGCTCT             | TTCAGCAAGGAGGAGGTCAT             |
| GLIS3           | ACAACCCCTCCTCCCAGTTA             | TGATGTGGTGAGGAGATGGA             |
| RFX6            | CATGTCGAACTCCAGTCCTAGCTT         | AGTCCAGGGTTTCTTGAGCTGGAT         |
| NKX2.2          | GGTGGCAGATTTTCGTTTTTCGTTG        | CGGTCCTGAAGGTCATTTTGGCA          |
| NKX6.1          | ATTCGTTGGGGATGACAGAG             | CGAGTCCTGCTTCTTCTTGG             |
| NEUROD          | ATTGCACCAGCCCTTCCTTTGATG         | TCGCTGCAGGATAGTGCATGGTAA         |
| MYT1            | AGTGTCTGCCAGGTGTCTT              | GACAGACAATAGCTGTGGGGA            |
| MNX1            | AGAAGGCGGAAACCCACAGTGTT          | CAGCAGTTTGAACGCTCGTGACA          |
| PAX6            | GCCCAGCTTCACCATGGCAAATAA         | ATCATAACTCCGCCCATTCACCGA         |
| hTBP            | TGCACAGGAGCCAAGAGTGAA            | CACATCACAGCTCCCCACCA             |
